# Supplementary material
Source: HighWire-hosted journal article supplement (https://www.cmaj.ca/highwire/filestream/59769/field_highwire_adjunct_files/4/151447-res-5-at.pdf)
Supplement: 151447-res-5-at.pdf [file 151447-res-5-at.pdf]

**Appendix 5 (as supplied by the authors): Reclassification table for validation cohort**

|                           |                                             | AKDN score  |             |           |       | Reclassified to new risk category, % |        |        | NRI    | P-value |
|---------------------------|---------------------------------------------|-------------|-------------|-----------|-------|--------------------------------------|--------|--------|--------|---------|
|                           |                                             | ≤ 2.5%      | 2.5 % - 20% | ≥ 20%     | Total | Lower                                | Higher | Total  |        |         |
| Cleveland<br>clinic score | <b>Patients who require dialysis</b>        |             |             |           |       |                                      |        | 0.161  | <0.001 |         |
|                           | ≤ 2.5%                                      | 41(74.5)    | 14(25.5)    | 0(0)      | 55    | -                                    | 25.5   | 25.5   |        |         |
|                           | 2.5 % - 20%                                 | 6(8.2)      | 53(72.6)    | 14(19.2)  | 73    | 8.2                                  | 19.2   | 27.4   |        |         |
|                           | ≥ 20%                                       | 0(0)        | 0(0)        | 9(100)    | 9     | 0.0                                  | -      | 0.0    |        |         |
|                           | <b>Total</b>                                | <b>47</b>   | <b>67</b>   | <b>23</b> | 137   |                                      |        |        |        |         |
| Cleveland<br>clinic score | <b>Patients who do not require dialysis</b> |             |             |           |       |                                      |        | -0.022 | <0.001 |         |
|                           | ≤ 2.5%                                      | 3358(92.7)  | 265(7.3)    | 0(0)      | 3623  | -                                    | 7.3    | 7.3    |        |         |
|                           | 2.5 % - 20%                                 | 195(28.6)   | 450(66.1)   | 36(5.3)   | 681   | 28.6                                 | 5.3    | 33.9   |        |         |
|                           | ≥ 20%                                       | 0(0)        | 11(42.3)    | 15(57.7)  | 26    | 42.3                                 | -      | 42.3   |        |         |
|                           | <b>Total</b>                                | <b>3553</b> | <b>726</b>  | <b>51</b> | 4330  |                                      |        |        |        |         |
| <b>Overall</b>            |                                             |             |             |           |       |                                      |        | 0.139  | <.001  |         |
